# Supplementary material for: Size-dependent uptake of electrically neutral amphipathic polymeric nanoparticles by cell-sized liposomes and an insight into their internalization mechanism in living cells
Source: Royal Society of Chemistry journal article supplement (doi:10.1039/c8cc00977e), 2018-01-01
Supplement: c8cc00977e1.pdf [file c8cc00977e1.pdf]

Electronic Supplementary Information (ESI) for

Size-Dependent Uptake of Electrically Neutral Amphipathic Polymeric  
Nanoparticles by Cell-sized Liposomes and an Insight into Their  
Internalization Mechanism in Living Cells

Shoko Ichikawa<sup>1</sup>, Naofumi Shimokawa<sup>2</sup>, Masahiro Takagi<sup>2</sup>, Yukiya Kitayama<sup>1</sup> and  
Toshifumi Takeuchi<sup>1\*</sup>

<sup>1</sup> Graduate School of Science and Technology, Kobe University

Rokkodai-cho, Nada-ku, Kobe 657-8501, Japan

takeuchi@gold.kobe-u.ac.jp

<sup>2</sup> School of Materials Science, Japan Advanced Institute of Science and Technology

1-1 Asahidai, Nomi, Ishikawa 923-1292, Japan

## Materials

1,2-Dioleoyl-*sn*-glycero-3-phosphocholine (DOPC), 1,2-dipalmitoyl-*sn*-glycero-3-phosphocholine (DPPC) and cholesterol were purchased from Avanti Polar Lipids (Alabaster, USA). Chloroform, diethylether, acetone, *N,N'*-methylenebisacrylamide (MBAA), 2,2'-azobis(2-methylpropionamidine)dihydrochloride (V-50), NaOH, HCl, 2-amino-2-hydroxymethyl-1,3-propanediol (Tris), and potassium Eu-encapsulated Preyssler-type phosphotungstate were purchased from Wako Pure Chemical Industries (Osaka, Japan). Sodium sulfate, *N*-isopropylacrylamide (NIPAm), hexane, methanol, ganglioside GM1, Accutase™, Dulbecco's modified Eagle's medium (DMEM, 4.5 g/L glucose), Dulbecco's phosphate-buffered saline without Ca and Mg (D-PBS), and penicillin-streptomycin mixed solution were purchased from Nacalai Tesque (Kyoto, Japan). Acryloyl chloride, 4-amino fluorescein ( $\lambda_{\text{ex}} = 490 \text{ nm}$ ,  $\lambda_{\text{em}} = 520 \text{ nm}$ ), and Alexa Fluor® 594-conjugated cholera toxin subunit B (CTB-594,  $\lambda_{\text{ex}} = 590 \text{ nm}$ ,  $\lambda_{\text{em}} = 617 \text{ nm}$ ) were purchased from Tokyo Chemical Industry (Tokyo, Japan). *N*-(Rhodamine red-X)-1,2-dihexadecanoyl-*sn*-glycero-3-phosphoethanolamine triethylammonium salt (Rho-DHPE,  $\lambda_{\text{ex}} = 560 \text{ nm}$ ,  $\lambda_{\text{em}} = 580 \text{ nm}$ ) and LysoTracker® Deep Red were purchased from Thermo Fisher Scientific (Waltham, USA). Deionized water was obtained from a Millipore Milli-Q purification system. 2-Methacryloyloxyethyl phosphorylcholine (MPC) was purchased from NOF Corporation (Tokyo, Japan). Calcein and calcein-AM were obtained from Dojindo Laboratories (Kumamoto, Japan). Fluorescein acrylamide (FAM) was synthesized by reacting 4-amino fluorescein and acryloyl chloride as described in the previous paper [1].

## Preparation of fluorescein-conjugated amphipathic nanoparticles (FL-NPs) (Fig. S1-S3)

FL-NPs were prepared by emulsifier-free precipitation polymerization of NIPAm (407 mg, 3.6 mmol), MBAA (30.8 mg, 0.2 mmol), MPC (59. mg, 0.2 mmol), and FAM (4.0 mg, 0.01 mmol) with V-50 (54.3 mg, 0.2 mmol) as an initiator in 10 mM Tris-HCl buffer (pH 7.4) at 70° C for 12 h. The obtained particles were purified by size exclusion chromatography using Sephadex G-100 with 10 mM Tris-HCl buffer (pH 7.4) as the eluent. The volume-based average particle size of the obtained FL-NPs was ca. 8.4 nm measured by DLS at 25°C. The maximum absorption and emission wavelengths of the FL-NPs were 504 and 526 nm, respectively, measured using a V-560 spectrophotometer (JASCO Ltd., Tokyo, Japan) and a fluorescence spectrophotometer (F-2500, HITACHI, Tokyo, Japan). For examining the amphipathicity of FLNPs, an octanol-water partitioning coefficient was estimated spectrophotometrically in a mixture of 1-octanol (3 mL) and water (3 mL) containing FL-NPs (final concentration: 1.05 mg/mL) using V-560. Particle size, size distribution, and  $\zeta$ -potential were measured using a dynamic light scattering system (DLS, Zetasizer Nano ZS, Malvern Instruments Ltd., Malvern, UK). For TEM sample preparation, FL-NPs were purified by size

exclusion chromatography using Sephadex G-100 with pure water, and the dispersion was dried on carbon-coated Cu-grid. The FL-NPs-dried Cu-grid inverted on 1 wt% phosphotungstate aqueous solution, then the sample was dried before TEM observation (JEM-1230, JEOL.Ltd).

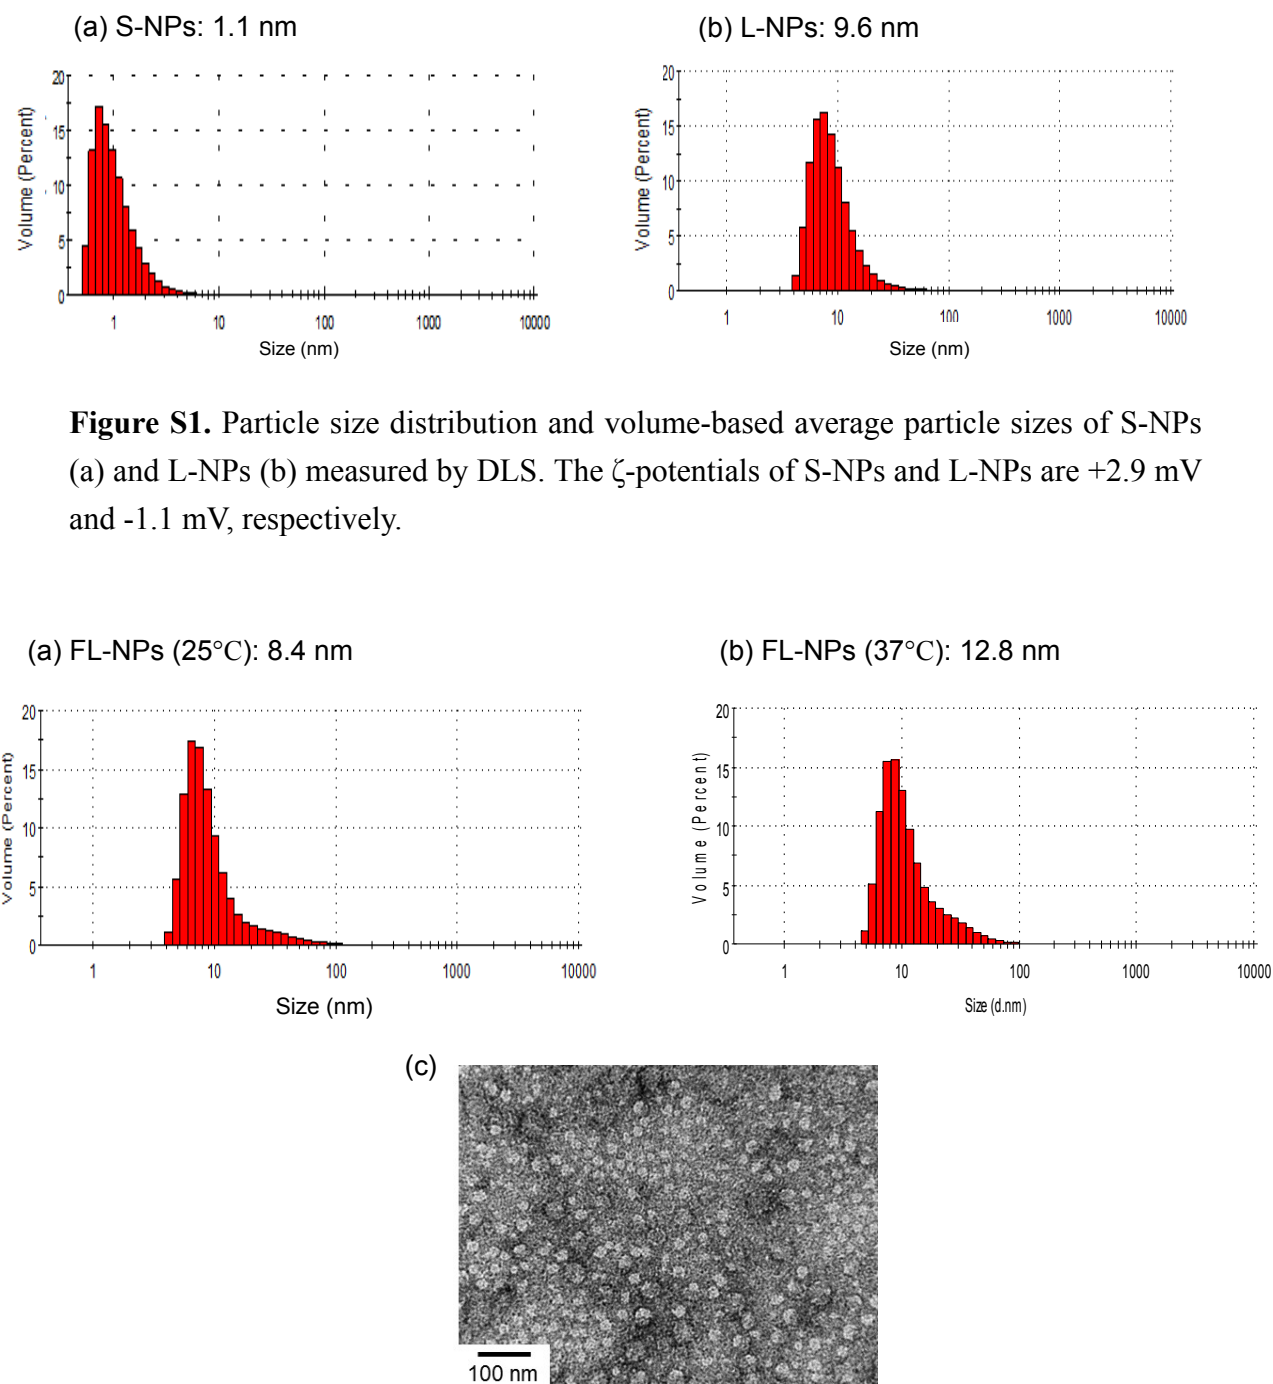

**Figure S2.** Particle size distribution and volume-based average particle size of FL-NPs measured by DLS (a: 25°C; b: 37°C) and transmission electron microscope (TEM) image of FL-NPs (c). The  $\zeta$ -potentials of FL-NPs is +1.58 mV.

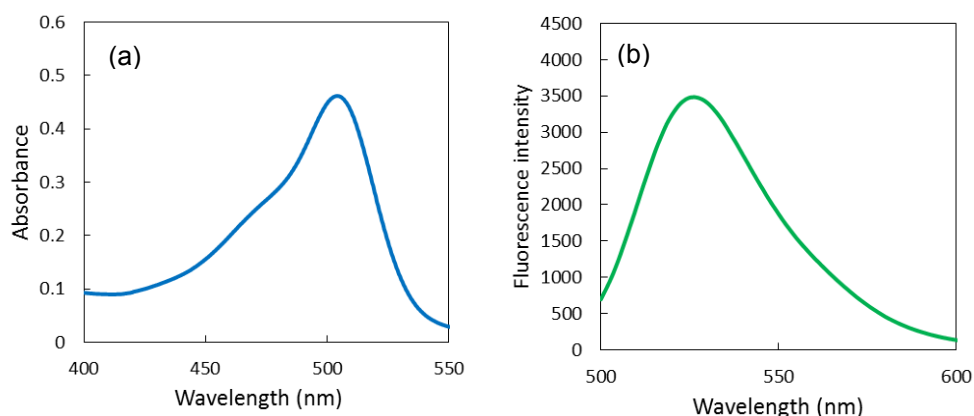

**Figure S3.** UV-Vis (a) and fluorescence (b) spectra for FL-NPs prepared by the emulsifier-free emulsion polymerization measured at 25 °C. Excitation wavelength for fluorescent measurement was 505 nm.

The obtained FL-NPs were fractionated into a smaller portion and a larger portion using an ultrafiltration membrane with a fractionation molecular weight of 10 kDa (Amicon Ultra, 4 mL, Merck Millipore,  $4,000 \times g$ , 20 min). The FL-NPs containing the filtrate and the residue were designated as S-NPs and L-NPs, respectively. The S-NPs were further purified using an ultrafiltration membrane with a fractionation molecular weight of 3 kDa (Amicon Ultra, 15 mL, Merck Millipore,  $14,000 \times g$ , 20 min). The volume-based average particle sizes of the obtained S-NPs and L-NPs were ca. 1.1 nm and 9.6 nm, respectively, measured by DLS at 25°C.

#### **Preparation of cell-sized liposomes (Fig. S4 and S5)**

Cell-sized liposomes were prepared by the gentle hydration method <sup>[2-4]</sup>. Lipids and Rho-DHPE were dissolved in chloroform: methanol (2:1 v/v) to prepare 2.0 mM and 0.10 mM solutions, respectively. The lipid solution (20  $\mu$ L) and Rho-DHPE (2  $\mu$ L) were transferred to a glass tube, and the organic solvent was evaporated using nitrogen gas, leading to a thin lipid film. The thin film was subsequently dried under vacuum for 3 h, and hydrated with 10 mM Tris-HCl buffer (pH 7.4, 200  $\mu$ L) at 55°C overnight. The final lipid concentration was 0.20 mM. The prepared compositions for homogeneous and heterogeneous liposomes were in molar ratios of DOPC: DPPC: cholesterol = 100:0:0 (DOPC liposomes), 0:67:33 (DPPC-chol liposomes), 40:40:20 (DOPC-DPPC-chol liposomes), and 50:50:0 (DOPC-DPPC liposomes).

(a)

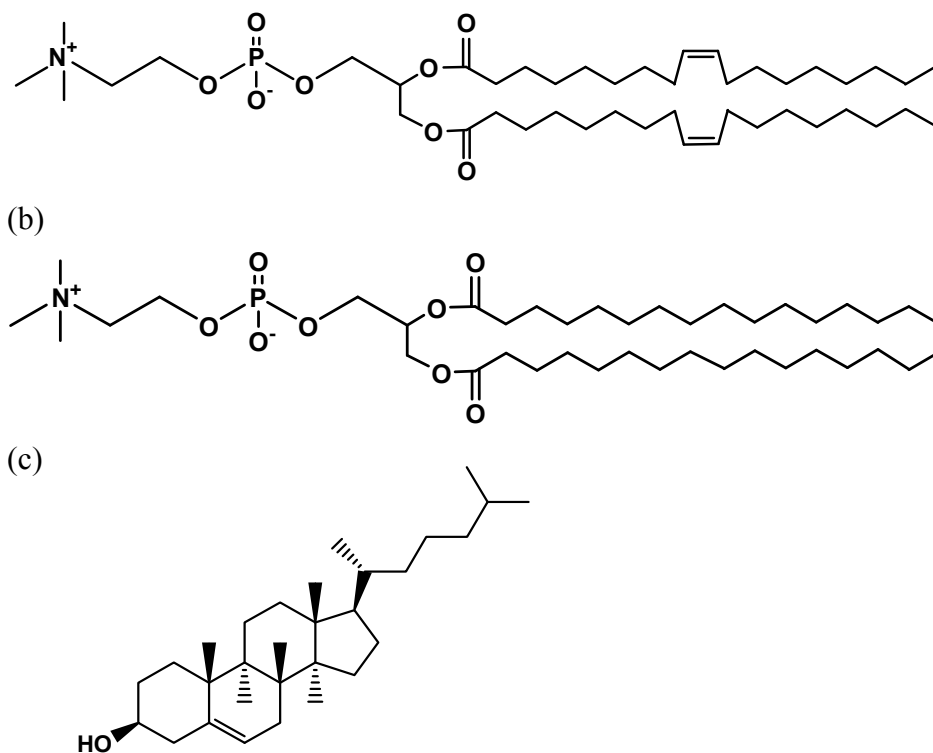

**Figure S4.** Chemical structures of (a) 1,2-dioleoyl-*sn*-glycero-3-phosphocholine (DOPC), (b) 1,2-dipalmitoyl-*sn*-glycero-3-phosphocholine (DPPC), and (c) cholesterol.

Liposomes with stained phase-separated regions were also prepared using the same procedure. Lipid films were prepared with the molar ratio of DOPC: DPPC: cholesterol = 40:40:20 containing 1 mol % GM1. The films were hydrated with 10 mM Tris-HCl buffer (100  $\mu$ L) at 37°C for 1 h. Then, the solution was mixed with 10 mM Tris-HCl buffer (pH 7.4, 100  $\mu$ L) containing 50  $\mu$ g mL<sup>-1</sup> CTB-594 [3].

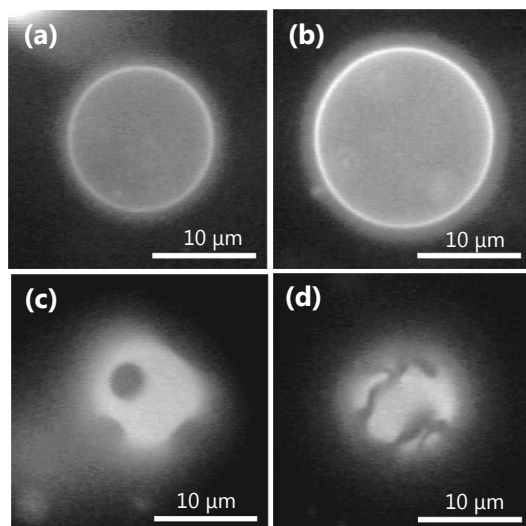

**Figure S5.** Cell-sized liposomes prepared by gentle hydration method in 10 mM Tris-HCl buffer (pH 7.4). (a) DOPC liposomes (14.0  $\mu$ m), (b) DPPC-chol liposomes (17.2  $\mu$ m), (c) DOPC-DPPC-chol liposomes (10.7  $\mu$ m), and (d) DOPC-DPPC liposomes (11.9  $\mu$ m) were prepared using various lipid compositions (molar ratios of DOPC: DPPC: chol = 100:0:0, 0:67:33, 40:40:20, and 50:50:0, respectively). Bright regions in (c) and (d): Rho-DHPE-localized DOPC-rich solid-disordered ( $L_d$ ) phase; dark region in (c): liquid-ordered ( $L_o$ ) phase; dark region in (d): solid-ordered ( $S_o$ ) phase.

#### Determination of logP for FL-NPs (Fig. S6)

FL-NPs were purified by size exclusion chromatography using Sephadex G-100 with pure water as an eluent. The dispersion (2 mL, solid content: 2.1 mg/mL) was dried in vacuo. The dried FL-NPs were re-dispersed with water-saturated 1-octanol (2 mL). The FL-NPs dispersion in 1-octanol was diluted with aqueous-saturated 1-octanol to draw a calibration curve of FL-NPs using UV-Vis spectroscopy ( $\lambda = 508$  nm).

For determination of logP of FL-NPs, FL-NPs dispersed in pure water (3 mL, solid content: 2.1 mg/mL) was incubated with 1-octanol (3 mL) at 37°C for 24 h. During the incubation, the volume change of both phases was negligible. The absorbance at 508 nm in the 1-octanol phase was measured to determine the FL-NPs concentration in the 1-octanol phase (FL-NPs<sub>org</sub>) using the prepared calibration curve. The FL-NPs

concentration in the aqueous phase (FL-NPs<sub>aq</sub>) can be calculated by subtracting the FL-NPs concentration in 1-octanol phase from the initial concentration. A Log P values was calculated to be -0.08 by Eq. S1

$$\text{Log P} = \log(\text{FL-NPs}_{\text{org}} / \text{FL-NPs}_{\text{aq}}) \quad (\text{S1})$$

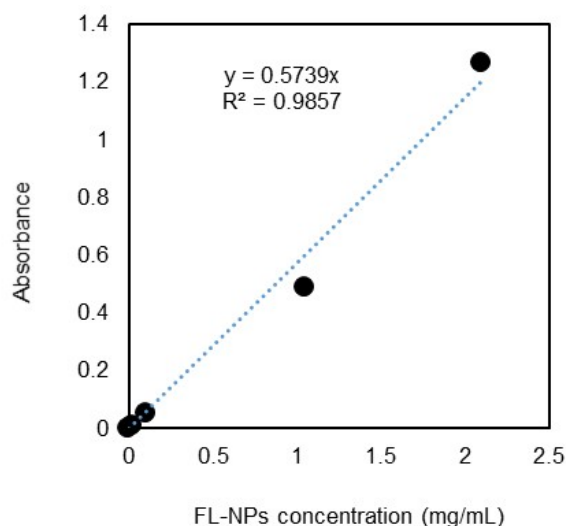

**Figure S6.** Calibration curve of FL-NPs concentration in 1-octanol ( $\lambda = 508$  nm).

### CLSM observation and uptake rate analysis (Fig. S7)

FL-NPs (0.54% wt.) and liposome dispersions (0.20 mM) were mixed (1:1 v/v) in a microtube. The mixed solution was immediately placed in a silicon well (thickness of 200  $\mu\text{m}$ ) on a glass slide and covered with a cover glass. Observations were performed for a total period of 3 h using CLSM (IX81, Olympus, Tokyo, Japan) at 25°C using filters U-MWIG3 ( $\lambda_{\text{ex}} = 550$  nm,  $\lambda_{\text{em}} = 580$  nm) for rhodamine, U-MWIY2 ( $\lambda_{\text{ex}} = 590$  nm,  $\lambda_{\text{em}} = 617$  nm) for Alexa Fluor® 594, and U-MWIB3 ( $\lambda_{\text{ex}} = 495$  nm,  $\lambda_{\text{em}} = 519$  nm, Olympus) for fluorescein. The objective lens was UPlanSApo (Olympus, 60 $\times$ , N.A. = 1.35), and the multi Ar laser had a wavelength conversion Mid-IR Laser Opti  $\lambda$  3360 (NTT Electronics, Kanagawa, Japan) and GLS3135 (Showa Optronics, Tokyo, Japan). Fluorescence microscopic images were also obtained using a fluorescence microscope IX73 (Olympus) equipped with U-FGW (Olympus) as the filter.

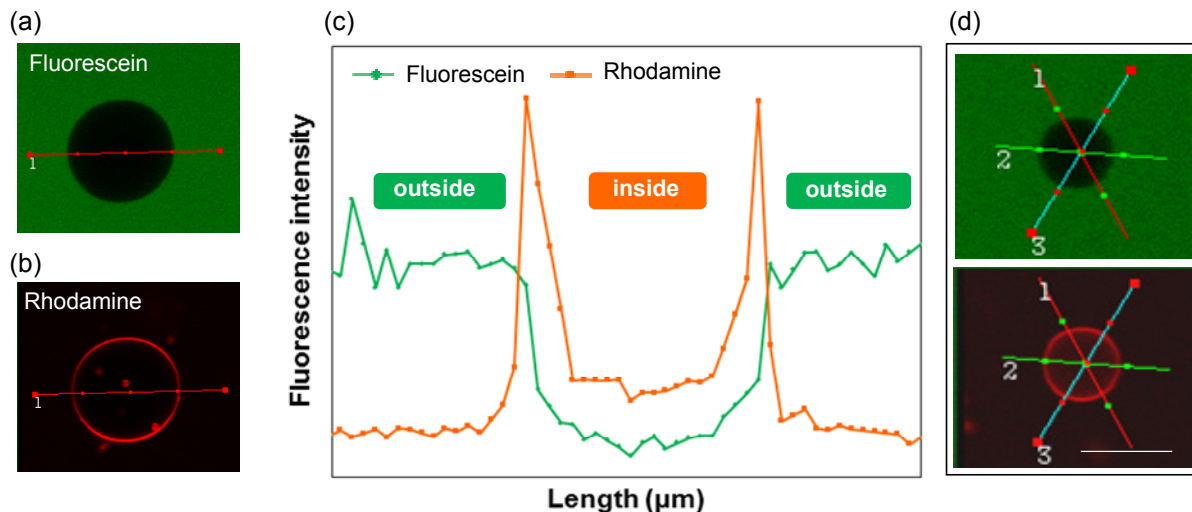

**Figure S7.** A method for measuring the fluorescence intensity of FL-NPs inside and outside cell-sized liposomes by confocal laser scanning microscopy (CLSM). (a) CLSM images of FL-NPs (fluorescein); (b) CLSM images of Rho-DHPE in the liposome membrane; (c) fluorescent intensities calculated by the one-dimensional analysis of the CLSM images (see red lines in a and b); (d) fluorescence intensity was measured in triplicate at different points of the same liposomes. Scale bar is 10  $\mu\text{m}$ .

To estimate the apparent uptake rate of FL-NPs in the liposomes after the administration of FL-NPs, the CLSM images were analyzed using the following method. Fluorescence intensities derived from Rho-DHPE and FL-NPs were quantified one-dimensionally by CLSM, where two peak maxima derived from Rho-DHPE were defined as the boundary of the liposome membrane.

The average fluorescence intensities on the inside and outside of the liposomes at time  $t$  (min) are defined as  $I_{i,t}$  and  $I_{o,t}$ , respectively. The net intensity is calculated by Eq. S2 to correct blurring of the laser source and quenching during the measurements, where  $I_{o,0}$  is the initial intensity (0 min).

$$I_{i,t} = \text{apparent } I_{i,t} \times \frac{I_{o,0}}{I_{o,t}} \quad (\text{S2})$$

A calibration curve for FL-NP concentration was plotted by measuring the fluorescence intensities at various concentrations of FL-NP dispersions. FL-NP concentrations on the inside of the liposomes ( $C_{i,t}$ ) were calculated from the linear calibration curve shown in Eq. S3 and the obtained  $I_{i,t}$  values. The change in FL-NP concentration on the inside of the liposomes,  $\Delta C_{i,t}$ , was evaluated from Eq. S4, where  $C_{i,0}$  is the initial concentration of the FL-NPs on the outside (0 min).

$$C_{i,t} = 3957.9 \times I_{i,t} + 15.646 \quad (S3)$$

$$\Delta C_{i,t} = C_{i,t} - C_{i,0} \quad (S4)$$

The uptake rates of FL-NPs were measured three times with three different cell-sized liposomes for DOPC and DOPC-DPPC-chol liposomes. The significant difference was observed between these liposomes, i.e. the student's t test  $p$  value was calculated to be less than 0.05 after  $3.5 \times 10^3$  sec. The uptake rate constant ( $k$ ) is calculated from measuring  $C_{i,t}$  and  $C_{o,0}$  in Eq. S5. Eq. S6 was generated by integrating Eq. S5, assuming that  $C_{o,0}$  is certain since the concentration of FL-NPs on the inside of the liposomes is much smaller than that of bulk FL-NPs, when the boundary conditions of  $t$  and  $C_t$  are from 0 to  $t$  and 0 to  $C_{i,t}$ , respectively. Finally, the uptake rate constant of FL-NPs was calculated by fitting in Eq. S6.

$$\frac{dC_i}{dt} = k(C_{o,0} - C_{i,t}) \quad (S5)$$

$$C_{i,t} = C_{o,0}\{1 - \exp(-kt)\} \quad (S6)$$

$C_{o,0}$  was calculated using Eq. S7, S8, and S9. The weight of FL-NPs added was calculated using the solid content (0.54% wt.) and the weight of the FL-NP dispersion used (x g). The volume of medium (water) was calculated using Eq. S8, where 1.00 g/mL was used as the density of water. When the liposome dispersion was mixed with the FL-NP dispersion at a one-to-one ratio,  $C_{o,0}$  was given by Eq. S9.

$$\text{Weight of FL-NPs used (mg)} = x \times \frac{0.54}{100} \quad (S7)$$

$$\text{Volume of medium (mL)} = x \times \frac{100-0.54}{100 \times 1.00} \quad (S8)$$

$$C_{o,0} = \frac{0.0054x}{0.9946x \times 2} = 2.71 \text{ mg/mL} \quad (S9)$$

### **Size-dependent uptake of S-NPs and L-NPs by NIH3T3 cells**

The murine cell line NIH3T3 known known as a commonly used standard fibroblast cell line was cultured to subconfluency in DMEM. Adherent cells were lysed using Accutase™ and seeded in dishes ( $1.5 \times 10^5$  cells/dish). After 24 h of incubation in a CO<sub>2</sub> incubator (37°C, 5% CO<sub>2</sub>), S-NPs or L-NPs (final concentration: 5.47 µg/mL) were administered to the dishes and incubated for 24 h (37°C, 5% CO<sub>2</sub>). LysoTracker® Deep Red (final concentration: 75 nM) was added and incubated for 1 h (37°C, 5% CO<sub>2</sub>). After washing with fresh DMEM, CLSM observation was conducted under the same conditions as those for cell-sized liposomes. Almost no particle size change was observed at 37°C, compared with the size at 25°C (Figure S2-b), which is consistent with our previous results,<sup>[1]</sup> where the LCST of PNIPAm-based nanogels was found to be elevated to approximately 60°C, when a hydrophilic monomer MPC was copolymerized.

### **Temperature-dependent uptake of calcein-AM, calcein, S-NPs, and L-NPs in NIH3T3 cells**

The temperature-dependent uptake of calcein, calcein-AM, S-NPs, and L-NPs in NIH3T3 cells was examined using a FACSCalibur HG flow cytometer with a filter for FITC ( $\lambda_{\text{ex}} = 530$  nm) (Becton, Dickinson and Company, Franklin Lakes, USA). The murine cell line NIH3T3 was cultured to subconfluency in DMEM. Adherent cells were lysed using Accutase™ and seeded in dishes ( $7.0 \times 10^5$  cells/dish). After 24 h of incubation in a CO<sub>2</sub> incubator (37°C, 5% CO<sub>2</sub>), calcein was administered (final concentration: 100 µg/mL) and incubated for 3 h in a CO<sub>2</sub> incubator (4°C or 37°C, 5% CO<sub>2</sub>). For the uptake at 4°C, the cells were pre-incubated for 30 min at 4°C before calcein administration. For calcein-AM, the final concentration was 5 µg/mL with 45 min incubation. S-NPs and L-NPs were incubated for 24 h at the final concentration of 5.47 µg/mL. After washing with D-PBS, adherent cells were lysed using Accutase™, and the cells were washed with D-PBS. The cells were then re-dispersed in 1 mL D-PBS and applied to the flow cytometer.

**(a) DOPC liposomes**

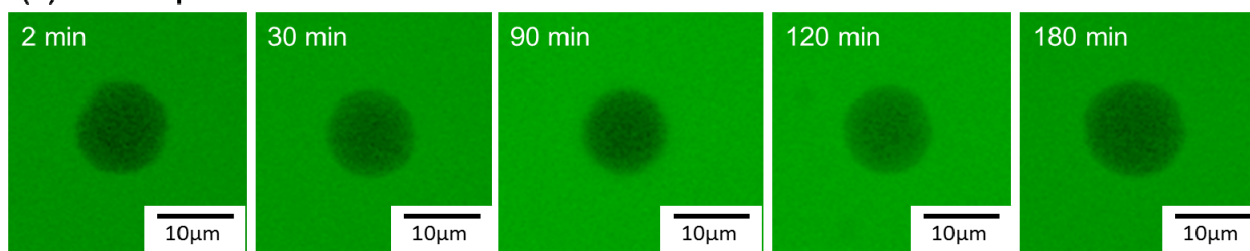

**(b) DPPC-chol liposomes**

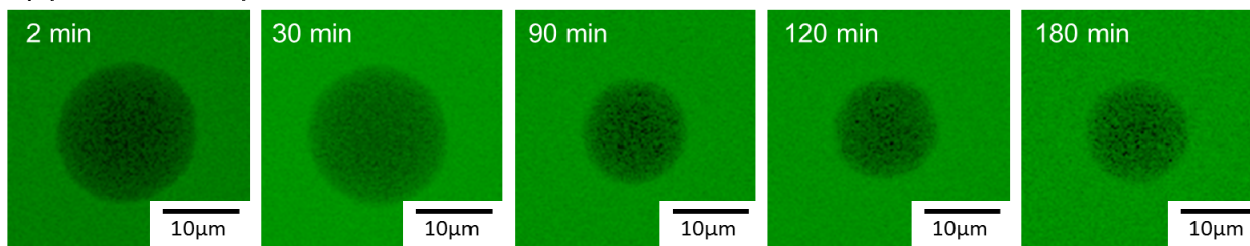

**(c) DOPC-DPPC-chol liposomes**

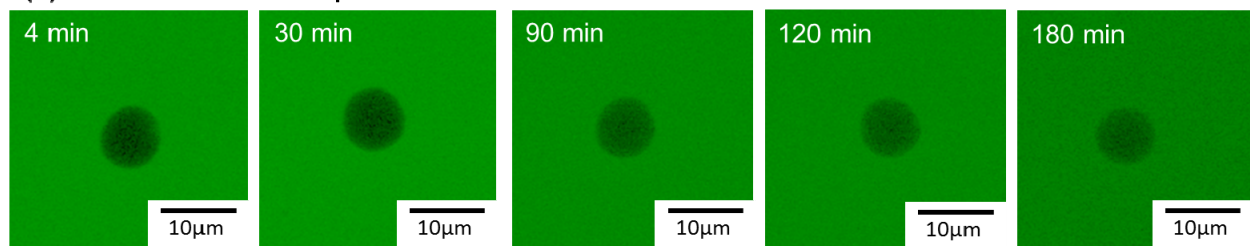

**(d) DOPC-DPPC liposomes**

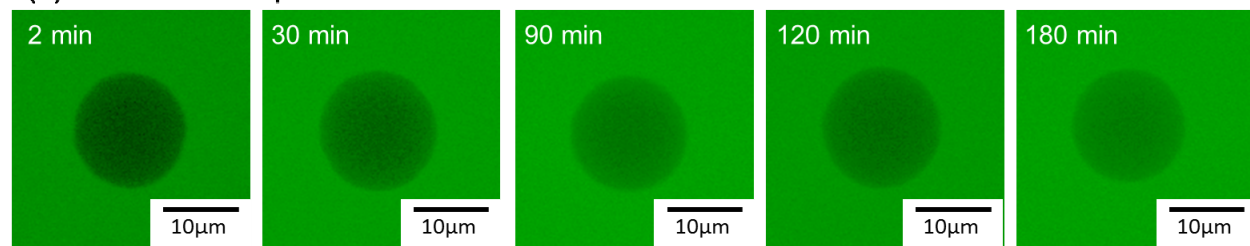

**Figure S8.** Confocal laser scanning microscopy (CLSM) images of FL-NPs (Fluorescein) at various times in (a) DOPC liposomes, (b) DPPC-chol liposomes, (c) DOPC-DPPC-chol liposomes, and (d) DOPC-DPPC liposomes. The slight size change of liposome in the CLSM image was caused by the Z position deviation of the cross section in the cell-sized liposomes.

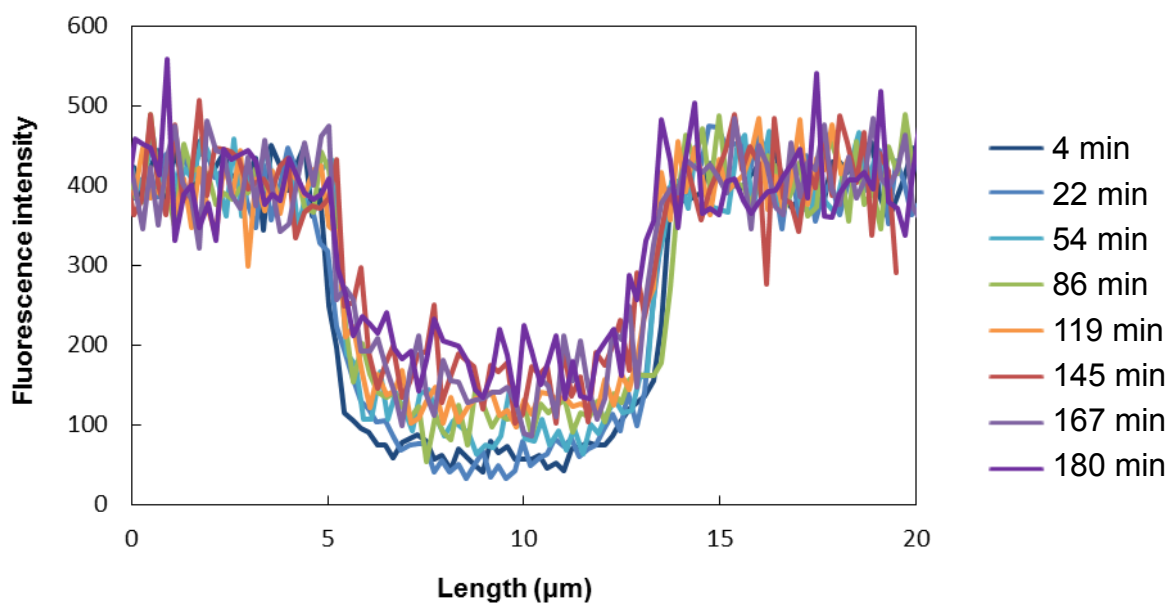

**Figure S9.** Raw data of CLSM for the time-dependent fluorescent intensity change in a homogeneous DOPC liposome by the FL-NP uptake.

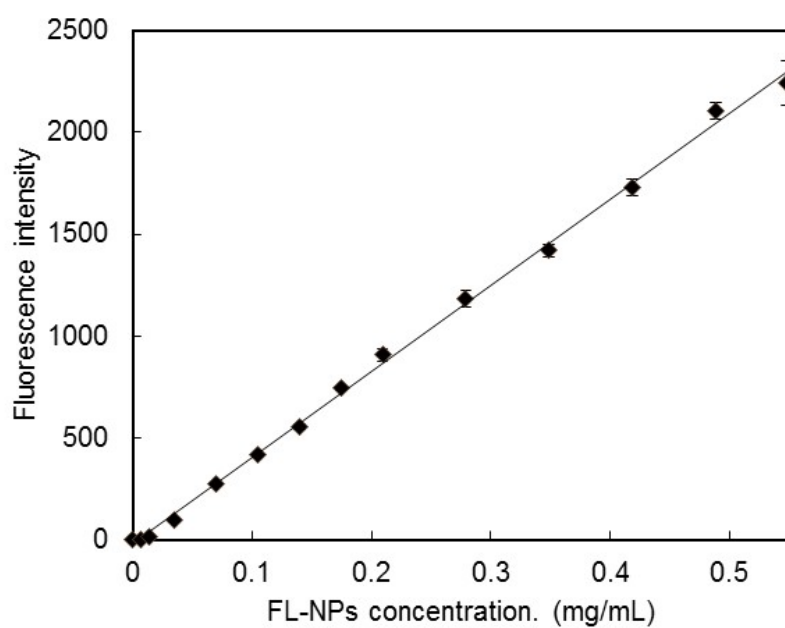

**Figure S10.** Calibration curve prepared by CLSM for determining FL-NPs concentration in 10 mM Tris-HCl buffer (pH 7.4). n=3.

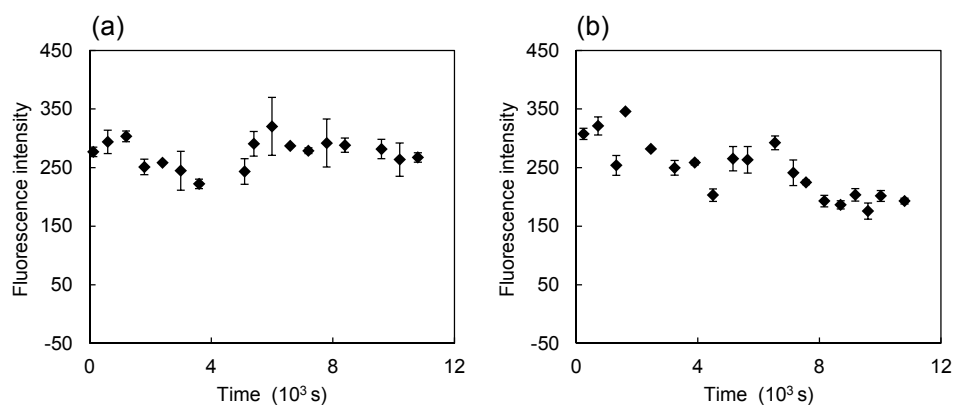

**Figure S11.** Fluorescence intensities derived from (a) Rho-DHPE-labeled  $L_d$  and (b) GM1/CTB-594-labeled  $L_o$  phases inside DOPC-DPPC-chol liposomes at various incubation times.

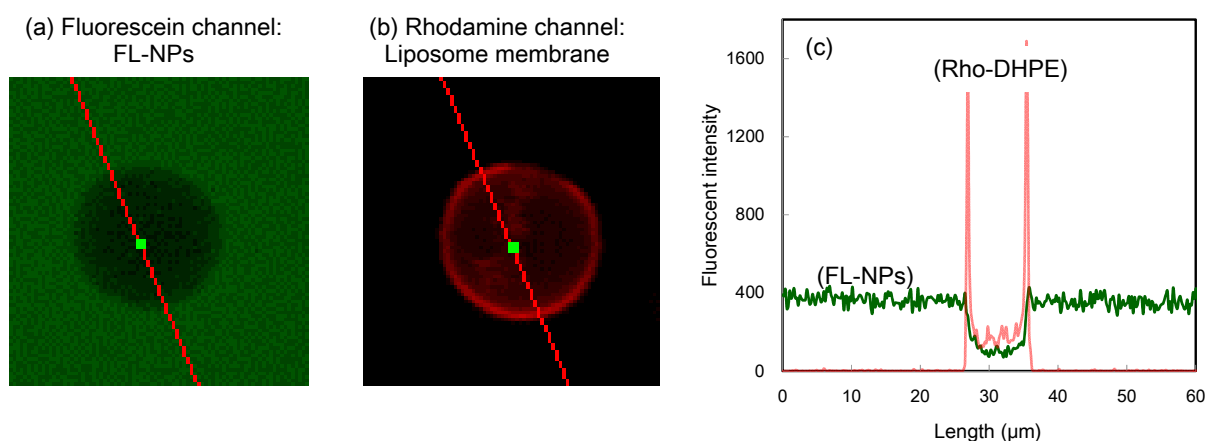

**Figure S12.** Confocal laser scanning microscopy (CLSM) images of FL-NPs (Fluorescein) (a) and Rho-DHPE in the DOPC/DPPC/chol liposome membrane (b), and fluorescent intensities calculated by the one-dimensional analysis (see red lines in a and b) of the CLSM images (c).

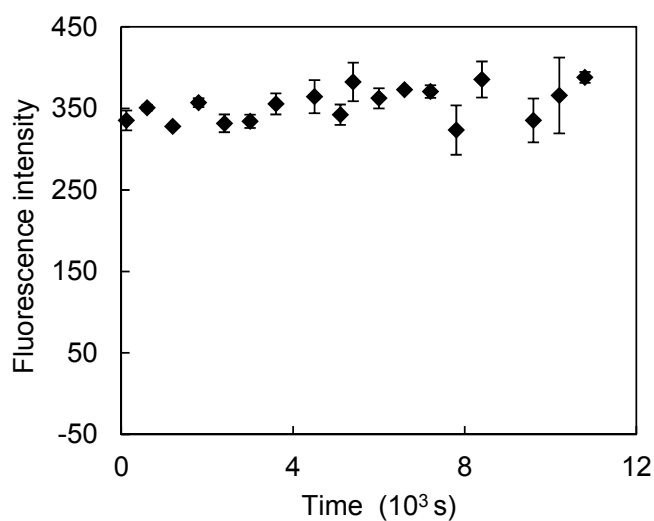

**Figure S13.** Fluorescence intensities derived from FL-NPs on the lipid membrane (a) and the raw data of time-dependent fluorescent intensity change inside DOPC/DPPC/chol liposome s by the FL-NP uptake measured by confocal laser scanning microscopy.

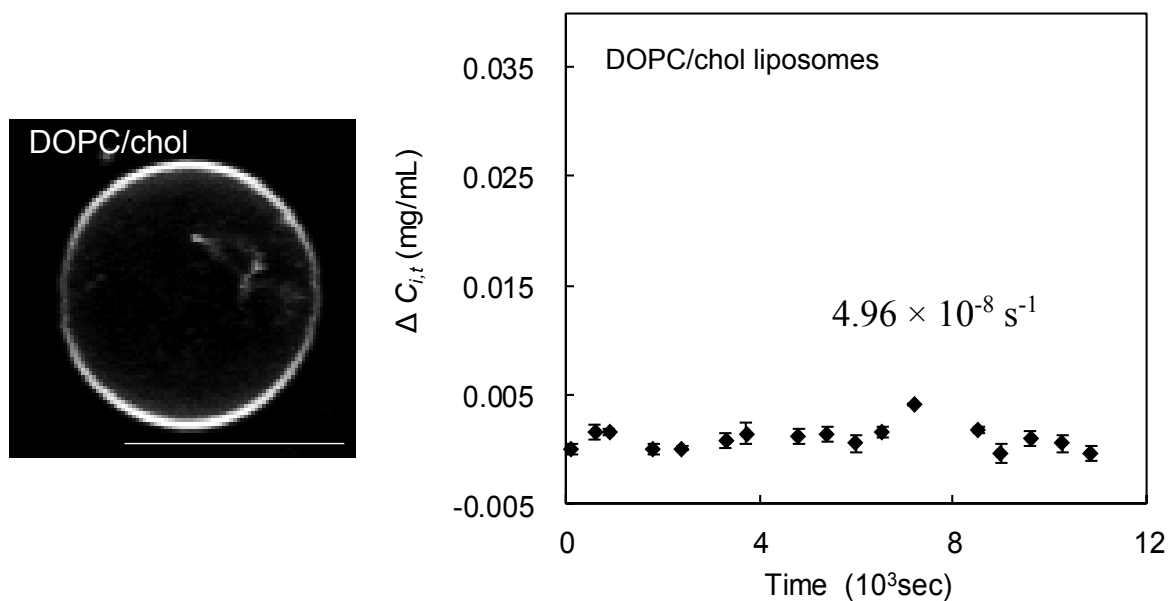

**Figure S14.** Fluorescent microscope image (left) and time course of the concentration change of FL-NPs on the inside of the DOPC-chol liposome. The concentration change of FL-NPs on the inside of the liposomes,  $\Delta C_{i,t}$ , is calculated using *Eq. S4*.

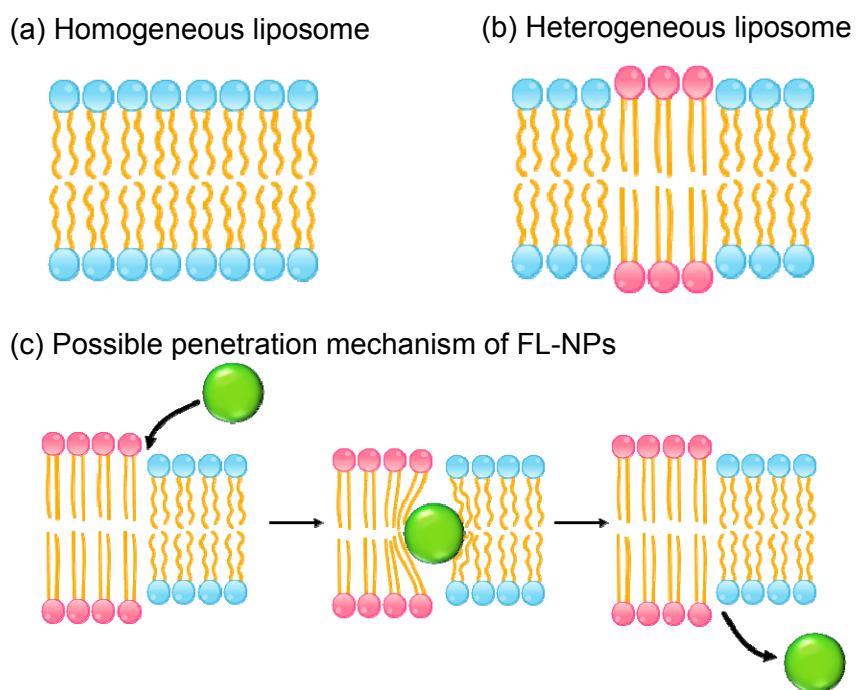

**Figure S15.** Schematic illustrations of membranes of (a) homogeneous liposomes, (b) heterogeneous liposomes, and (c) a possible mechanism of penetration into the liposomes.

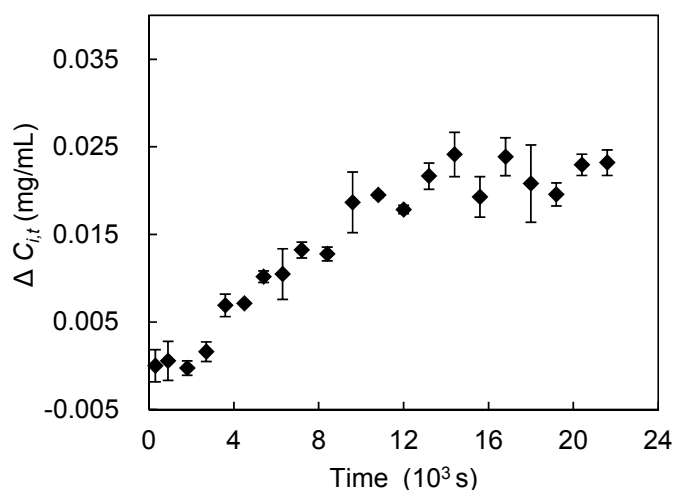

**Figure S16.** Relative FL-NP concentrations on the inside of the liposomes after 6 h of incubation with DOPC-DPPC-cho.  $\Delta C_{it}$  is calculated by Eq. S4.

## REFERENCES

1. T. Takeuchi, Y. Kitayama, R. Sasao, T. Yamada, K. Toh, Y. Matsumoto and K. Kataoka, *Angew. Chem. Int. Ed.* **2017**, 56, 7088.
2. K. Tahara, S. Tadokoro, Y. Kawashima, N. Hirashima, *Langmuir* **2012**, 28 (18), 7114-7118.
3. T. Hamada, Y. Miura, K.-I. Ishii, S. Araki, K. Yoshikawa, M. D. Vestergaard, M. Takagi, *J. Phys. Chem. B* **2007**, 111 (37), 10853-10857.
4. N. Rodriguez, F. Pincet, S. Cribier, *Colloid. Surface B Biointerfaces* **2005**, 42 (2), 125-130.
